# Supplementary material for: Global Illness and Deaths Caused by Rotavirus Disease in Children
Source: PubMed Central journal article supplement (PMC2972763; doi:10.3201/eid0905.020562), 2003-05
Supplement: 02-0562_appA-s1.pdf [file 02-0562_appA-s1.pdf]

## Appendix A. [online only] Studies of Rotavirus Diarrhea Included in this Analysis

1. Bhan MK, Bhandari N, Sazawal S, Clemens J, Raj P, Levine MM, et al. Descriptive epidemiology of persistent diarrhoea among young children in rural northern India. *Bull World Health Organ* 1989;67:281–8.
2. Raj P, Bhan MK, Prasad AK, Kumar R, Bhandari N, Jayashree S. Electrophoretic study of the genome of human rotavirus in rural Indian community. *Indian J Med Res* 1989;89:65–8.
3. Nath G, Shukla BN, Reddy DCS, Sanyal SC. A community study on the aetiology of childhood diarrhoea with special reference to *Campylobacter jejuni* in a semiurban slum of Varanasi, India. *J Diarrhoeal Dis Res* 1993;11:165–8.
4. Nath G, Singh SP, Sanyal SC. Childhood diarrhoea due to rotavirus in a community. *Indian J Med Res* 1992;95:259–62.
5. Yachha SK, Singh V, Kanwar SS, Mehta S. Epidemiology, subgroups and serotypes of rotavirus diarrhea in north Indian communities. *Indian J Pediatr* 1994;31:27–33.
6. Schorling JB, Wanke CA, Schorling SK, McAuliffe JF, deSouza A, Guerrant RL. A prospective study of persistent diarrhea among children in an urban Brazilian slum. *Am J Epidemiol* 1990;132:144–56.
7. Black RE, de Romana GL, Brown KH, Bravbo N, Bazalar OG, Kanashiro HC. Incidence and etiology of infantile diarrhea and major routes of transmission in Huascar, Peru. *Am J Epidemiol* 1989;129:785–99.
8. Cravioto A, Reyes RE, Ortega R, Fernandez G, Hernandez R, Lopez D. Prospective study of diarrhoeal disease in a cohort of rural Mexican children: incidence and isolated pathogens during the first two years of life. *Epidemiol Infect* 1988;101:123–34.
9. Cruz JR, Caceres P, Cano F, Flores J, Bartlett A, Torun B. Adenovirus types 40 and 41 and rotaviruses associated with diarrhea in children from Guatemala. *J Clin Microbiol* 1990;28:1780–4.
10. Linhares AC, Gabbay YB, Freitas RB, da Rosa ES, Mascarenhas JDP, Loureiro ECB. Longitudinal study of rotavirus infections among children from Belem, Brazil. *Epidemiol Infect* 1989;102:129–45.
11. Perez-Schael I, Garcia D, Gonzalez M, Gonzalez R, Daoud N, Perez M, et al. Prospective study of diarrheal diseases in Venezuelan children to evaluate the efficacy of rhesus rotavirus vaccine. *J Med Virol* 1990;30:219–29.
12. Espinoza F, Paniagua M, Hallander H, Svensson L, Strannegard O. Rotavirus infections in young Nicaraguan children. *Pediatr Infect Dis J* 1997;16:564–71.
13. Perez-Schael I. The impact of rotavirus disease in Venezuela. *J Infect Dis* 1996 Sep;174(Suppl 1):S19–21.
14. Zaki AM, DuPont HL, el Alamy MA, Arafat RR, Amin K, Awad MM, et al. The detection of enteropathogens in acute diarrhea in a family cohort population in rural Egypt. *Am J Trop Med Hyg* 1986;35:1013–22.
15. Naficy AB, Abu-Elyazeed R, Holmes JL, Rao MR, Savarino SJ, Kim Y, et al. Epidemiology of rotavirus diarrhea in Egyptian children and implications for disease control. *Am J Epidemiol* 1999;150:770–7.
16. Varavithya W, Vathanophas K, Bodhidatta L, Punyaratabandhu P, Sangchai R, Athipanyakom S, et al. Importance of salmonellae and *Campylobacter jejuni* in the etiology of diarrheal disease among children less than 5 years of age in a community in Bangkok, Thailand. *J Clin Microbiol* 1990;28:2507–10.
17. Khalil K, Lindblom GB, Mazhar K, Khan SR, Kajiser B. Early child health in Lahore, Pakistan: VIII. Microbiology. *Acta Paediatr* 1993;390:S87–94.
18. Yap KL, Yasmin AM, Wong YH, Ooi YE, Tan SC, Jegathesan M, et al. A one year community-based study on the incidence of diarrhoea and rotavirus infection in urban and suburban Malaysian children. *Med J Malaysia* 1992;47:303–8.
19. Coker AO, Dosunmu-Ogunbi O, Odugbemi T, Alabi SA, Macaulay SA. A study on the prevalence of rotavirus diarrhoeas in Ohazora local government area, Imo State, Nigeria, and the Lagos University Teaching Hospital, Lagos, Nigeria. *East Afr Med J* 1987;586–9.
20. Nakano T, Binka FN, Afari EA, Agbodaze D, Aryeetey ME, Mingle JAA, et al. Survey of enteropathogenic agents in children with and without diarrhoea in Ghana. *J Trop Med Hyg* 1990;93:408–12.
21. Oyejide CO, Fagbami AH. An epidemiological study of rotavirus diarrhoea in a cohort of Nigerian infants: II. Incidence of diarrhoea in the

- first two years of life. *Int J Epidemiol* 1988;17:908–12.
22. Tswana SA, Jorgensen PH, Halliwell RW, Kapaata R, Moyo SR. The incidence of rotavirus infection in children from two selected study areas in Zimbabwe. *Cent Afr J Med* 1990;36:241–6.
  23. Molbak K, Wested N, Hojlyng N, Scheutz F, Gottschau A, Aaby P, et al. The etiology of early childhood diarrhea: a community study from Guinea-Bissau. *J Infect Dis* 1994;169:581–7.
  24. Punyaratabandhu P, Vathanophas K, Varavithya W, Sangchai R, Ahipanyakom S, Echeverria P, et al. Childhood diarrhoea in a low-income urban community in Bangkok: incidence, clinical features, and child caretaker's behaviours. *J Diarrhoeal Dis Res* 1991;9:244–9.
  25. Bhan MK, Raj P, Bhandari N, Svensson L, Stintzing G, Prasad AK, et al. Role of enteric adenoviruses and rotaviruses in mild and severe acute enteritis. *Pediatr Infect Dis J* 1988;7:320–3.
  26. Broor S, Husain M, Chatterjee B, Chakraborty A, Seth P. Temporal variation in the distribution of rotavirus electropherotypes in Delhi, India. *J Diarrhoeal Dis Res* 1993;11:14–8.
  27. Racz ML, Candeias JA, Trabulsi JR, Murahowski J. Diarrheal diseases in Brazil: clinical features of rotavirus-associated gastroenteritis in children. *Eur J Epidemiol* 1988;4:382–5.
  28. Stewien KE, da Cunha LC, Alvim A de C, dos Reis Filho SA, Alvim MA, Brandao AA, et al. Rotavirus associated diarrhoea during infancy in the city of S. Luis (MA), Brazil: a two-year longitudinal study. *Revista do Instituto de Medicina Tropical de Sao Paulo* 1991;33:459–64.
  29. Candeias JAN, Racz ML, Travulsi LR, Murahowsky J. Relative prevalence of rotavirus diarrhoea in children attending outpatient departments of hospitals and general practitioners in Sao Paulo, Brazil. *J Diarrhoeal Dis Res* 1989;7:24–7.
  30. Perez-Schael I, Gonzalez R, Fernandez R, Alfonzo E, Inaty D, Boher Y, et al. Epidemiological features of rotavirus infection in Caracas, Venezuela: implications for rotavirus immunization programs. *J Med Virol* 1999;59:520–6.
  31. Dutta SR, Khalfan SA, Baig BH, Philipose L, Fulayfil R. Epidemiology of rotavirus diarrhoea in children under five years in Bahrain. *Int J Epidemiol* 1990;19:722–7.
  32. Pazzaglia G, Bourgeois AL, Araby I, Mikhail I, Podgore JK, Mourad A, et al. Campylobacter-associated diarrhoea in Egyptian infants: epidemiology and clinical manifestations of disease and high frequency of concomitant infections. *J Diarrhoeal Dis Res* 1993;11:6–13.
  33. Herrmann JE, Blacklow NR, Perron-Henry DM, Clements E, Taylor DN, Echeverria P. Incidence of enteric adenoviruses among children in Thailand and the significance of these viruses in gastroenteritis. *J Clin Microbiol* 1988;26:1783–6.
  34. Bingnan F, Unicomb L, Rahim Z, Nahar Banu N, Podder G, Clemens J, et al. Rotavirus-associated diarrhea in rural Bangladesh: two-year study of incidence and serotype distribution. *J Clin Microbiol* 1991;29:1359–63.
  35. Phetsouvanh R, Midorikawa Y, Nakamura S. The seasonal variation in the microbial agents implicated in the etiology of diarrheal diseases among children in Lao People's Democratic Republic. *Southeast Asian J Trop Med Public Health* 1999;30:319–23.
  36. Faruque ASG, Mahalanabis D, Islam A, Hoque SS, Hasnat A. Common diarrhea pathogens and the risk of dehydration in young children with acute watery diarrhea: a case-control study. *Am J Trop Med Hyg* 1993;49:93–100.
  37. Armah GE, Mingle JA, Doodoo AK, Anyanful A, Antwi R, Commey J, et al. Seasonality of rotavirus infection in Ghana. *Ann Trop Paediatr* 1994;14:223–9.
  38. Wu H, Taniguchi K, Urasawa T, Urasawa S. Serological and genomic characterization of human rotaviruses detected in China. *J Med Virol* 1998;55:168–76.
  39. Fang ZY, Yang H, Zhang J, Li YF, Hou AC, Ma L, et al. Child rotavirus infection in association with acute gastroenteritis in two Chinese sentinel hospitals. *Pediatr Int* 2000;42:401–5.
  40. Huilan S, Zhen LG, Mathan MM, Mathew MM, Olarte J, Espejo R, et al. Etiology of acute diarrhoea among children in developing countries: a multicentre study in five countries. *Bull World Health Organ* 1991;69:549–55.
  41. Malik A, Rattan A, Malik MA, Shukla I. Rotavirus diarrhoea of infancy and childhood in a North Indian town—epidemiological aspects. *J Trop Pediatr* 1987;33:243–5.
  42. Brown DW, Mathan MM, Mathew M, Martin R, Beards GM, Mathan VI. Rotavirus epidemiology in Vellore, south India: group, subgroup,

- serotype, and electrophoretotype. *J Clin Microbiol* 1988;6:2410–4.
43. Singh PB, Sreenivasan MA, Pavri KM. Viruses in acute gastroenteritis in children in Pune, India. *Epidemiol Infect* 1989;102:345–53.
  44. Desai HS, Banker DD. Rotavirus infection among children in Bombay. *Indian J Med Sci* 1993;47:27–33.
  45. Chakravarti A, Kumar S, Mittal SK, Broor S. Clinical and epidemiological features of acute gastroenteritis caused by human rotavirus subgroups. *J Diarrhoeal Dis Res* 1992;10:21–4.
  46. Aggarwal P, Singh M, Guha DK. Prevalence of bacterial pathogens and rotavirus in hospitalised children with acute diarrhoea in Delhi, India. *J Diarrhoeal Dis Res* 1988;6:37–8.
  47. Kelkar SD, Purohit SG, Simha KV. Prevalence of rotavirus diarrhoea among hospitalized children in Pune, India. *Indian J Med Res* 1999;109:131–5.
  48. Ballal M, Jyothiratha, Kotigadde S, Venkatesh A, Shivananda PG. Rotavirus and bacterial enteropathogens causing acute diarrhea. *Ind J Pediatr* 1992;59:203–7.
  49. Chakravarti A, Broor S, Natarajan R, Setty VS, Mittal SK. Epidemiological and clinical characteristics of acute diarrhoea in children due to human rotavirus. *J Trop Pediatr* 1992;38:192–3.
  50. Patwari AK, Srinivasan A, Diwan N, Aneja S, Anand VK, Peshin S. Rotavirus as an aetiological organism in acute watery diarrhoea in Delhi children: reappraisal of clinical and epidemiological characteristics. *J Trop Pediatr* 1994;40:214–8.
  51. Husain M, Seth P, Broor S. Detection of group A rotavirus by reverse transcriptase and polymerase chain reaction in feces from children with acute gastroenteritis. *Arch Virol* 1995;140:1225–33.
  52. Singh V, Broor S, Mehta S, Mehta SK. Molecular epidemiology of human rotavirus infections in Chandigarh (India). *Indian J Med Res* 1990;91:9–14.
  53. Ghosh SK, Naik TN. Evidence for a new rotavirus subgroup in India. *Epidemiol Infect* 1989;102:523–30.
  54. Aggarwal P, Srivastav VK, Singh M, Khanna KK. Rotavirus shown to be the main cause of acute childhood diarrhoea in a New Delhi Hospital with a high prevalence in winter. *J Diarrhoeal Dis Res* 1988;6:39–40.
  55. Singh V, Broor S, Mehta S, Mehta SK. Clinical and epidemiological features of acute gastroenteritis associated with human rotavirus subgroups 1 and 2 in northern India. *Indian J Gastroenterol* 1989;8:23–5.
  56. Mathew M, Mathan MM, Mani K, George R, Jebakumar K, Dharamsi R, et al. The relationship of microbial pathogens to acute infectious diarrhoea of childhood. *J Trop Med Hyg* 1991;94:253–60.
  57. Dowe G, King SD, Maitland PB, Swaby-Ellis DE. Laboratory investigations on rotavirus in infantile gastroenteritis in Jamaica. *Trans R Soc Trop Med Hyg* 1988;82:155–9.
  58. Stewien KE, Mos EN, Yanaguita RM, Jerez JA, Durigon EL, Harsi CM, et al. Viral, bacterial and parasitic pathogens associated with severe diarrhoea in the city of Sao Paulo, Brazil. *J Diarrhoeal Dis Res* 1993;11:148–52.
  59. Cardoso D, Martins RM, Kitajima EW, Barbosa AJ, Camarota SC, Azevedo MS. Rotavirus and adenovirus in 0- to 5-year-old children hospitalized with or without gastroenteritis in Goiana, GO, Brazil. *Revista do Instituto de Medicina Tropical de Sao Paulo* 1992;34:433–9.
  60. Teixeira JM, de Figueiredo RB, dos Santos HM, Ferreira MN, Camara GN. Epidemiology of rotavirus infections in the Federal District, Brazil. *Revista Da Sociedade Brasileira de Medicina Tropical* 1991;24:223–30.
  61. Puerto FI, Polanco GG, Gonzalez MR, Zavala JE Jr, Ortega G. Role of rotavirus and enteric adenovirus in acute paediatric diarrhoea at an urban hospital in Mexico. *Trans R Soc Trop Med Hyg* 1989;83:396–8.
  62. Suzuki H, Sato T, Kitaoka S, Tazawa F, Konno T, Amano Y, et al. Epidemiology of rotavirus in Guayaquil, Ecuador. *Am J Trop Med Hyg* 1986;35:372–5.
  63. Urquidi V. Molecular epidemiology of human rotavirus infection in Coro, Venezuela. *Acta Cientifica Venezolana* 1989;40:33–9.
  64. Perez-Schael I, Gonzalez R, Fernandez R, Alfonzo E, Inaty D, Boher Y, et al. Epidemiological features of rotavirus infection in Caracas, Venezuela: implications for rotavirus immunization programs. *J Med Virol* 1999;59:520–6.
  65. Cama RI, Parashar UD, Taylor DN, Hickey T, Figueroa D, Ortega YR, et al. Enteropathogens and other factors associated with severe

- disease in children with acute watery diarrhea in Lima, Peru. *J Infect Dis* 1999;179:1139–44.
66. Shukry S, Zaki AM, DuPont HL, Shoukry I, el Tagi M, Hamed Z. Detection of enteropathogens in fatal and potentially fatal diarrhea in Cairo, Egypt. *J Clin Microbiol* 1986;24:959–62.
  67. el-Mougi M, Amer A, el-Abhar A, Hughes J, el-Shafie A. Epidemiological and clinical features of rotavirus associated acute infantile diarrhoea in Cairo, Egypt. *J Trop Pediatr* 1989;35:230–3.
  68. Aithala G, Al Dhahry SH, Saha A, Elbualy MS. Epidemiological and clinical features of rotavirus gastroenteritis in Oman. *J Trop Pediatr* 1996;42:54–7.
  69. Dagan R, Bar-David Y, Sarov B, Katz M, Kassis I, Greenberg D, et al. Rotavirus diarrhea in Jewish and Bedouin children in the Negev region of Israel: epidemiology, clinical aspects and possible role of malnutrition in severity of illness. *Pediatr Infect Dis J* 1990;9:314–21.
  70. Adkins HJ, Escamilla J, Santiago L, Ranoa C, Echeverria P, Cross JH. Two-year survey of etiologic agents of diarrheal disease at San Lazaro Hospital, Manila, Republic of Philippines. *J Clin Microbiol* 1987;25:1143–7.
  71. Marjoribanks HC, Croxson MC, Potoi N, Bellamy AR. Infantile gastroenteritis in Western Samoa. *New Zealand Med J* 1988;101:195–7.
  72. Pipittajan P, Kasempimolporn S, Ikegami N, Akatani K, Wasi C, Sinarachatanant P. Molecular epidemiology of rotaviruses associated with pediatric diarrhea in Bangkok, Thailand. *J Clin Microbiol* 1991;29:617–24.
  73. Hasegawa A, Mukoyama A, Suzuki H, Inouye S, Chearskul S, Thongkrajai P, et al. Rotavirus infection of Thai infants: antigen detection, RNA electrophoresis and virus cultivation. *J Diarrhoeal Dis Res* 1987;5:165–70.
  74. Bern C, Unicomb L, Gentsch JR, Banul N, Yunus M, Sack RB, et al. Rotavirus diarrhea in Bangladeshi children: correlation of disease severity with serotypes. *J Clin Microbiol* 1992;30:3234–8.
  75. San Pedro MC, Walz SE. A comprehensive survey of pediatric diarrhea at a private hospital in Metro Manila. *Southeast Asian J Trop Med Public Health* 1991;22:203–10.
  76. Doan TN, Nguyen VC. Preliminary study on rotavirus diarrhoea in hospitalized children at Hanoi. *J Diarrhoeal Dis Res* 1986;4:81–2.
  77. Howard P, Alexander ND, Atkinson A, Clegg AO, Gerega G, Javati A, et al. Bacterial, viral and parasitic aetiology of paediatric diarrhoea in the highlands of Papua New Guinea. *J Trop Pediatr* 2000;46:10–4.
  78. Suwatano O. Acute diarrhea in under five-year-old children admitted to King Mongkut Prachomkiao Hospital, Phetchaburi province. *J Med Assoc Thai* 1997;80:26–33.
  79. Hoque SS, Faruque AS, Mahalanabis D, Hasnat A. Infectious agents causing acute watery diarrhoea in infants and young children in Bangladesh and their public health implications. *J Trop Pediatr* 1994;40:351–4.
  80. Mubashir M, Khan A, Baqai R, Iqbal J, Ghafoor A, Zuberi S, et al. Causative agents of acute diarrhoea in the first 3 years of life: hospital-based study. *J Gastroenterol Hepatol* 1990;5:264–70.
  81. Mendis L, de Silva D, Soysa P, Lamabadusuriya SP. Rotavirus infection in children hospitalised with diarrhoea in Sri Lanka. *J Diarrhoeal Dis Res* 1990;8:90–3.
  82. Khan MM, Iqbal J, Ghafoor A, Burney MI. Aetiological agents of diarrhoeal diseases in hospitalised children in Rawalpindi, Pakistan. *J Diarrh Dis Res* 1988;6:228–31.
  83. Yap KL, Wong YH, Khor CM, Ooi YE. Rotavirus electropherotypes in Malaysian children. *Can J Microbiol* 1992;38:996–9.
  84. Sirisanthana V, Leechanachai P, Poocharoen L. A clinical study of rotavirus diarrhea in Thai children. *J Med Assoc Thai* 1987;70:567–73.
  85. Tabassum S, Shears P, Hart CA. Genomic characterization of rotavirus strains obtained from hospitalized children with diarrhoea in Bangladesh. *J Med Virol* 1994;43:50–6.
  86. Albert MJ, Faruque AS, Faruque SM, Sack RB, Mahalanabis D. Case-control study of enteropathogens associated with childhood diarrhea in Dhaka, Bangladesh. *J Clin Microbiol* 1999;37:3458–64.
  87. Nishio O, Matsui K, Oka T, Ushijima H, Mubina A, Dure-Samin A, et al. Rotavirus infection among infants with diarrhea in Pakistan. *Pediatr Int* 2000;42:425–7.
  88. Maneekarn N, Ushijima H. Epidemiology of rotavirus infection in Thailand. *Pediatr Int* 2000;42:415–21.

89. Unicomb LE, Kilgore PE, Faruque SG, Hamadani JD, Fuchs GJ, Albert MJ, et al. Anticipating rotavirus vaccines: hospital-based surveillance for rotavirus diarrhea and estimates of disease burden in Bangladesh. *Pediatr Infect Dis J* 1997;16:947–51.
90. Teka T, Faruque AS, Fuchs GJ. Risk factors for deaths in under-age-five children attending a diarrhoea treatment centre. *Acta Paediatr* 1996;85:1070–5.
91. Mpabalwani M, Oshitani H, Kasolo F, Mizuta K, Luo N, Matsubayashi N, et al. Rotavirus gastro-enteritis in hospitalized children with acute diarrhoea in Zambia. *Ann Trop Paediatr* 1995;15:39–43.
92. Kakai R, Wamola IA, Bwayo JJ, Ndinya-Achola JO. Enteric pathogens in malnourished children with diarrhoea. *East Afr Med J* 1995;72:288–9.
93. Saidi SM, Iijima Y, Sang WK, Mwangudza AK, Oundo JO, Taga K, et al. Epidemiological study on infectious diarrheal diseases in children in a coastal rural area of Kenya. *Microbiol Immunol* 1997;41:773–8.
94. Gomwalk NE, Gosham LT, Umoh UJ. Rotavirus gastroenteritis in pediatric diarrhoea in Jos, Nigeria. *J Trop Pediatr* 1990;36:52–5.
95. Casalino M, Yusuf MW, Nicoletti M, Bazzicalupo P, Coppo A, Colonna B, et al. A two-year study of enteric infections associated with diarrhoeal diseases in children in urban Somalia. *Trans R Soc Trop Med Hyg* 1988;82:637–41.
96. Coker AO, Dosunmu-Ogunbi O, Odugbemi T, Alabi SA, Macaulay SA. A study on the prevalence of rotavirus diarrhoeas in Ohazora local government area, Imo State, Nigeria, and the Lagos University Teaching Hospital, Lagos, Nigeria. *East Afr Med J* 1987;586–9.
97. Tazi-Lakhsassi L, Garbarg-Chenon A, Nicolas JC, Soubhi H, Benbachir M, el Mdaghri N, et al. Epidemiological and clinical study and electrophoretotyping survey of rotavirus acute diarrhoea in a children's infectious disease unit in Casablanca, Morocco. *Annales de l'Institut Pasteur Virol* 1988;139:205–15.
98. Gomwalk NE, Umoh UJ, Gosham LT, Ahmad AA. Influence of climatic factors on rotavirus infection among children with acute gastroenteritis in Zaria, northern Nigeria. *J Trop Pediatr* 1993;39:293–7.
99. Koulla-Shiro S, Loe C, Ekoe T. Prevalence of *Campylobacter enteritis* in children from Yaounde (Cameroon). *Cent Fr J Med* 1995;41:91–4.
100. Cisse MF, Ouangre RA, Gaye A, Boye CS, Sow AI, Mboup S, et al. Causes of infectious gastro-enteritis in children in Dakar. *Presse Med* 1989;18:1827–30.
101. Mefane C, Richard-Lenoble D, Gendrel D, Engonah E. Infantile diarrhea in Libreville (Gabon). Ecological studies. *Arch Fr Pediatr* 1986;43:813–6.
102. Tchambaz M, Messaoudi Z, Meziane O, Ammari H. Detection of rotavirus in the stools of infants aged 0–3 yr (study performed from July 1987 to May 1989). *Arch Inst Pasteur Alger* 1989;57:83–103.
103. Trabelsi A, Peenze I, Pager C, Jeddi M, Steele D. Distribution of rotavirus VP7 serotypes and VP4 genotypes circulating in Sousse, Tunisia, from 1995 to 1999: emergence of natural human reassortants. *J Clin Microbiol* 2000;38:3415–9.
104. Bos P, Mnisi YN, Steele AD. The molecular epidemiology of rotavirus infection in Ga-Rankuwa, southern Africa. *Cent Afr J Med* 1992;38:286–90.
105. Steele AD, Geyer A, Alexander JJ, Crewe-Brown HH, Fripp PJ. Enteropathogens isolated from children with gastro-enteritis at Ga-Rankuwa Hospital, South Africa. *Ann Trop Paediatr* 1988;8:262–7.
106. Griffiths FH, Steele AD, Alexander JJ. The molecular epidemiology of rotavirus-associated gastro-enteritis in the Transkei, Southern Africa. *Ann Trop Paediatr* 1992;12:259–64.
107. Steele AD, Alexander JJ. The relative frequency of subgroup I and II rotaviruses in black infants in South Africa. *J Med Virol* 1988;24:321–7.
108. Steele AD, Bos P, Alexander JJ. Clinical features of acute infantile gastroenteritis associated with human rotavirus subgroups I and II. *J Clin Microbiol* 1988;26:2647–9.
109. Visser LE, Cano Portero R, Gay NJ, Martinez Navarro JF. Impact of rotavirus disease in Spain: an estimate of hospital admissions due to rotavirus. *Acta Paediatr* 1999;88:S72–6.
110. deWit MAS, Koopmans MPG, van der Blig JF, van Duynhoven YTHP. Hospital admissions for rotavirus infection in the Netherlands. *Clin*

Infect Dis 2000;31:698–704.

111. Parashar UD, Holman RC, Clarke MJ, Bresee JS, Glass RI. Hospitalizations associated with rotavirus diarrhea in the United States, 1993 through 1995: surveillance based on the new ICD-9-CM rotavirus-specific diagnostic code. *J Infect Dis* 1998;177:13–7.
112. Mrukowicz JZ, Krobicka B, Duplaga M, Kowalska-Duplaga K, Domanski J, Szajewska H, et al. Epidemiology and impact of rotavirus diarrhoea in Poland. *Acta Paediatr* 1999;88:53–60.
113. Johansen K, Bennet R, Bondesson K, Eriksson M, Hedlund KO, De Verdier Klingenberg K, et al. Incidence and estimates of the disease burden of rotavirus in Sweden. *Acta Paediatr* 1999;426:S20–3.
114. Ryan MJ, Ramsay M, Brown D, Gay NJ, Farrington CP, Wall PG. Hospital admissions attributable to rotavirus infection in England and Wales. *J Infect Dis* 1996;174(Suppl 1):S12–8.
115. Vesikari T, Rautanen T, Bonsdorff CHV. Rotavirus gastroenteritis in Finland: burden of disease and epidemiological features. *Acta Paediatr* 1999;426:S24–30.
116. Carlin JB, Chondros P, Masendycz P, Bugg H, Bishop RF, Barnes GL. Rotavirus infection and rates of hospitalisation for acute gastroenteritis in young children in Australia, 1993-1996. *Med J Aust* 1998;169:252–6.
117. Szucs G, Uj M, Mihaly I, Deak J. Burden of human rotavirus-associated hospitalizations in three geographic regions of Hungary. *Acta Paediatr* 1999;426:S61–5.
118. Ferson MJ. Hospitalizations for rotavirus gastroenteritis among children under five years of age in New South Wales. *Medical Journal of Australia* 1996;164:273–6.
119. Ford-Jones EL, Wang E, Petric M, Corey P, Moineddin R, Fearon M, et al. Rotavirus-associated diarrhea in outpatient settings and child care centers. *Arch Pediatr Adolesc Med* 2000;154:586–93.
120. Rodriguez WJ, Kim HW, Brandt CD, Schwartz RH, Gardner MK, Jeffries B, et al. Longitudinal study of rotavirus infection and gastroenteritis in families served by a pediatric medical practice: clinical and epidemiologic observations. *Pediatr Infect Dis J* 1987;6:170–6.
121. Donelli G, Ruggeri FM, Tinari A, Marziano ML, Caione D, Concato C, et al. A three-year diagnostic and epidemiological study on viral infantile diarrhea in Rome. *Epidem Infect* 1988;100:311–20.
122. Ruggeri FM, Marziano ML, Tinari A, Salvatori E, Donelli G. Four-year study of rotavirus electropherotypes from cases of infantile diarrhea in Rome. *J Clin Microbiol* 1989;27:1522–6.
123. Arista S, Giovannelli L, Pistoia D, Cascio A, Parea M, Gerna G. Electropherotypes, subgroups, and serotypes of human rotavirus strains causing gastroenteritis in infants and young children in Palermo, Italy, from 1985 to 1989. *Res Virol* 1990;141:435–48.
124. Barnes GL, Uren E, Stevens KB, Bishop RF. Etiology of acute gastroenteritis in hospitalized children in Melbourne, Australia, from April 1980 to March 1993. *J Clin Microbiol* 1998;36:133–8.
125. Caprioli A, Pezzella C, Morelli R, Giammanco A, Arista S, Crotti D, et al. Enteropathogens associated with childhood diarrhea in Italy. *Pediatr Infect Dis J* 1996;15:876–83.
126. Superti F, Diamanti E, Giovannangeli S, Dobi V, Xhelili L, Donelli G. Electropherotypes of rotavirus strains causing gastroenteritis in infants and young children in Tirana, Albania, from 1988 to 1991. *Acta Virol* 1995;39:257–61.
127. Muller FM, Onder G, Kamin W, Gutjahr P, Schmitt HJ. Diarrhea in 1,337 children of the Mainz University Clinic: Importance of *Salmonella* and rotaviruses. *Klinische Padiatrie* 1993;205:9–13.
128. Gosciniak G, Sobieszczanska B, Grzybek-Hryncewicz K. Rotavirus diarrhea in children hospitalized in Wroclaw clinics. *Przegląd Lekarski* 1990;47:682–5.
129. Pazdiora P, Taborska J, Mlada L, Kobesova A. Clinical and epidemiologic findings from a study of rotavirus infections in hospitalized children. *Ceskoslovenska Epidemiologie Mikrobiologie Imunologie* 1990;39:149–54.
130. Sadurska E. Studies on the role of rotaviruses in the etiology of acute diarrhea in infants. *Pediatrics Polska* 1989;64:2–8.
131. Begue RE, Neill MA, Papa EF, Dennehy PH. A prospective study of shiga-like toxin-associated diarrhea in a pediatric population. *J Pediatr Gastroenterol Nutr* 1994;19:164–9.

132. Donelli G, Superti F, Tinari A, Marziano ML, Caione D, Concato C, et al. Viral childhood diarrhoea in Rome: a diagnostic and epidemiological study. *Microbiologica* 1993;16:215–26.
133. Grimwood K, Carzino R, Barnes GL, Bishop RF. Patients with enteric adenovirus gastroenteritis admitted to an Australian pediatric teaching hospital from 1981 to 1992. *J Clin Microbiol* 1995;33:131–6.
134. Sack RB, Santosham M, Reid R, Black R, Croll J, Yolken R, et al. Diarrhoeal diseases in the White Mountain Apaches: clinical studies. *J Diarrhoeal Dis Res* 1995;13:12–7.
135. Berner R, Schumacher RF, Hameister S, Forster J. Occurrence and impact of community-acquired and nosocomial rotavirus infections—a hospital-based study over 10 y. *Acta Paediatr Suppl* 1999;88:48–52.
136. Ginevskaya VA, Amitina NN, Eremeeva TP, Shirman GA, Priimagi LS, Drozdov SG. Electropherotypes and serotypes of human rotavirus in Estonia in 1989–1992. *Arch Virol* 1994;137:199–207.
137. Vizzi E, Cascio A, Arista S. Caratterizzazione antigenica di rotavirus umani riscontrati a Palermo negli anni 1989-92. *Igiene Moderna* 1994;102:547–55.
138. Gonzalez FS, Sordo ME, Rowensztein G, Sabbag L, Roussos A, De Petre E, et al. Rotavirus diarrhea. Impact in a pediatric hospital of Buenos Aires. *Medicina (B Aires)* 1999;59:321–6.
139. Uriarte S, Gomez J, Scolaro L. Rotavirus infection in children seen at a greater Buenos Aires hospital. *Rev Argent Microbiol* 1999;31:87–9.
140. Dutta SR, Khalfan SA, Baig BH, Philipose L, Fulayfil R. Epidemiology of rotavirus diarrhoea in children under five years in Bahrain. *Int J Epidemiol* 1990;19:722–7.
141. Milaat WA, el Assouli SM. Epidemiology of diarrhoea in two major cities in Saudi Arabia. *J Communicable Dis* 1995;27:84–91.
142. Mohammed KA, el Assouli SM, Banjar ZM. Human rotavirus subgroups and serotypes in children with acute gastroenteritis in Saudi Arabia from 1988 to 1992. *J Med Virol* 1994;44:237–42.
143. el Assouli SM, Banjar ZM, Mohammed KA, Zamakhchari FT. Rotavirus infection in children in Saudi Arabia. *Am J Trop Med Hyg* 1992;46:272–7.
144. Sethi SK, Khuffash F. Bacterial and viral causes of acute diarrhoea in children in Kuwait. *J Diarrhoeal Dis Res* 1989;7:85–8.
145. Huq MI, Rahman AS, Al-Sadiq A, Al-Shahri A, Alim AR. Rotavirus as an important cause of diarrhoea in a hospital for children in Dammam, Saudi Arabia. *Ann Trop Paediatr* 1987;7:173–6.
146. al-Bwardy MA, Ramia S, al-Frayh AR, Chagla AH, al-Omair AA, el-Hazmi MA, et al. Bacterial, parasitic and viral enteropathogens associated with diarrhoea in Saudi children. *Ann Trop Paediatr* 1988;8:26–30.
147. Khuffash FA, Sethi SK, Shaltout AA. Acute gastroenteritis: clinical features according to etiologic agents. *Clin Pediatr (Phila)* 1988;27:365–8.
148. el Assouli SM, Mohammed KA, Banjar ZM. Human rotavirus genomic RNA electropherotypes in Jeddah, Saudi Arabia from 1988 to 1992. *Ann Trop Paediatr* 1995;15:45–53.
149. el Assouli SM, Banjar ZM, Mohammed KA, Milaat WA, el Assouli MZ. Genetic and antigenic analysis of human rotavirus prevalent in Al-Taif, Saudi Arabia. *J Trop Pediatr* 1996;42:211–9.
150. Sethi S, Khuffash FA, Al-Nakib W. Microbial etiology of acute gastroenteritis in hospitalized children in Kuwait. *Pediatr Infect Dis J* 1989;8:593–7.
151. Kim KH, Suh IS, Kim JM, Kim CW, Cho YJ. Etiology of childhood diarrhea in Korea. *J Clin Microbiol* 1989;27:1192–6.
152. Tam JS, Kum WW, Lam B, Yeung CY, Ng MH. Molecular epidemiology of human rotavirus infection in children in Hong Kong. *J Clin Microbiol* 1986;23:660–4.
153. Chan PK, Tam JS, Nelson EA, Fung KS, Adeyemi-Doro FA, Fok TF, et al. Rotavirus infection in Hong Kong: epidemiology and estimates of disease burden. *Epidemiol Infect* 1998;120:321–5.
154. Biswas R, Lyon DJ, Nelson EA, Lau D, Lewindon PJ. Aetiology of acute diarrhoea in hospitalized children in Hong Kong. *Trop Med Int Health* 1996;1:679–83.

155. Kim KH, Yang JM, Joo SI, Cho YG, Glass RI, Cho YJ. Importance of rotavirus and adenovirus types 40 and 41 in acute gastroenteritis in Korean children. *J Clin Microbiol* 1990;28:2279–84.
156. Vijayan V, Quak SH, Wong HB. Incidence, clinical features and epidemiology of rotavirus gastro-enteritis in hospitalized children. *Ann Trop Paediatr* 1990;10:179–83.
157. Ling JM, Cheng AF. Infectious diarrhoea in Hong Kong. *J Trop Med Hyg* 1993;96:107–12.
158. Seo JK, Sim JG. Overview of rotavirus infections in Korea. *Pediatr Int* 2000;42:406–10.
159. Steele AD, Alexander JJ, Hay IT. Rotavirus-associated gastroenteritis in black infants in South Africa. *J Clin Microbiol* 1986;23:992–4.
160. Bos P, Mnisi YN, Steele AD. The molecular epidemiology of rotavirus infection in Ga-Rankuwa, southern Africa. *Cent Afr J Med* 1992;38:286–90.
161. Steele AD, Geyer A, Alexander JJ, Crewe-Brown HH, Fripp PJ. Enteropathogens isolated from children with gastro-enteritis at Ga-Rankuwa Hospital, South Africa. *Ann Trop Paediatr* 1988;8:262–7.
162. Griffiths FH, Steele AD, Alexander JJ. The molecular epidemiology of rotavirus-associated gastro-enteritis in the Transkei, South Afr *Ann Trop Paediatr* 1992;12:259–64.
163. Steele AD, Alexander JJ. The relative frequency of subgroup I and II rotaviruses in black infants in South Africa. *J Med Virol* 1988;24:321–7.
164. Steele AD, Bos P, Alexander JJ. Clinical features of acute infantile gastroenteritis associated with human rotavirus subgroups I and II. *J Clin Microbiol* 1988;26:2647–9.
